# Supplementary material for: Voice Assistants as Consultants for Male Patients with Sexual Dysfunction: A Reliable Option?
Source: Int J Environ Res Public Health. 2023 Feb 1;20(3):2612. doi: 10.3390/ijerph20032612 (PMC9914936; doi:10.3390/ijerph20032612)
Supplement: Supplementary file 1 [file ijerph-20-02612-s001.zip › ijerph-2155781-supplementary.pdf]

**Table S1.** Questions administered to VAs

|                                                              |
|--------------------------------------------------------------|
| <b>ED</b>                                                    |
| What is impotence?                                           |
| At what age can a man suffer from impotence?                 |
| How frequent is impotence?                                   |
| Why does a man become impotent?                              |
| Can prostate problems cause impotence?                       |
| Does smoking and alcohol cause impotence?                    |
| I don't want to have sex anymore, what happens?              |
| Who treats Impotence?                                        |
| How do I know if I have impotence?                           |
| How is impotence treated?                                    |
| Are there natural remedies for impotence?                    |
| Where can I buy impotence drugs?                             |
| How are impotence drugs taken?                               |
| What can i do if impotence drugs don't work?                 |
| What is a penile prosthesis?                                 |
| <b>PE</b>                                                    |
| How long should a sexual intercourse last?                   |
| How long does it take a man to come normally?                |
| When is ejaculation premature? What is definition of..       |
| Is it normal to come immediately when you are young?         |
| Why am I coming so early?                                    |
| Could it be the anxiety that makes me come too early?        |
| Who treats premature ejaculation?                            |
| How do I know if I have premature ejaculation?               |
| How can I last longer during a sexual intercourse?           |
| How is premature ejaculation treated?                        |
| Is premature ejaculation treatable?                          |
| Are there natural remedies for premature ejaculation?        |
| Where can I buy drugs for premature ejaculation?             |
| Does alcohol help not come too early?                        |
| Can I use an anesthetic for premature ejaculation?           |
| <b>PD</b>                                                    |
| Why do I have a curved penis?                                |
| Why does my penis hurt when I have an erection?              |
| Why is the penis bending?                                    |
| My penis seems smaller to me, what happens?                  |
| What is Peyronie's disease?                                  |
| I can feel a lump on my penis, what can it be?               |
| Will my penis go straight?                                   |
| Who treats a curved penis?                                   |
| How is Peyronie's disease treated?                           |
| Can Peyronie's disease be cured?                             |
| Does the surgery for curved penis work?                      |
| Will my penis go straight back after surgery?                |
| Will my penis go back as long as before after the operation? |
| Are there natural remedies for Peyronie's disease?           |
| What alternatives are there to surgery?                      |
| <b>Male infertility</b>                                      |

|                                                                   |
|-------------------------------------------------------------------|
| What is infertility?                                              |
| How does a man become sterile?                                    |
| What are the causes of male infertility?                          |
| What is varicocele?                                               |
| Can varicoceles cause Infertility?                                |
| Up to what age can a man have children?                           |
| Why can't I have children with my wife?                           |
| How do I know if I'm fertile?                                     |
| What is a spermiogram?                                            |
| How is a spermiogram performed?                                   |
| Who treats male infertility?                                      |
| How is male infertility treated?                                  |
| Are there natural remedies for male infertility?                  |
| What is assisted reproduction?                                    |
| When is it necessary to do assisted reproduction?                 |
| <b>Other</b>                                                      |
| How long is a normal penis?                                       |
| How do I stretch my penis?                                        |
| How do you make a woman come?                                     |
| Where is G-spot?                                                  |
| Too much sex hurts?                                               |
| How do I know if I'm a fetishist?                                 |
| I'm afraid that I am a pedophile. What can I do?                  |
| What birth control methods are effective for not having children? |
| Too much masturbation hurts?                                      |
| How can I avoid sexually transmisted diseases?                    |
| I feel a lump in my testicle, what should I do?                   |
| How do I know if I'm gay?                                         |
| What is phimosis?                                                 |
| My testicle hurts, what can I do?                                 |
| What is a condom for?                                             |

VA: Voice Assistant; ED: Erectile Dysfunction; PE: Premature Ejaculation; PD: Peyronie’s Disease.

Table S2. Quality and characteristics of the answers formulated by VAs.

| Condition | Domain                                           | VA               | Mean | SD    | 95% CI      |             | Quality      | P-value |
|-----------|--------------------------------------------------|------------------|------|-------|-------------|-------------|--------------|---------|
|           |                                                  |                  |      |       | Lower Bound | Upper Bound |              |         |
| ED        | Targeted response to the problem                 | Siri             | 5.40 | 4.073 | 3.88        | 6.92        | Intermediate | 0.427   |
|           |                                                  | Alexa            | 4.07 | 4.110 | 2.53        | 5.60        | Intermediate |         |
|           |                                                  | Google Assistant | 4.90 | 3.745 | 3.50        | 6.30        | Intermediate |         |
|           |                                                  | Total            | 4.79 | 3.973 | 3.96        | 5.62        | Intermediate |         |
|           | Scientific correctness of the answer             | Siri             | 4.83 | 3.405 | 3.56        | 6.10        | Intermediate | 0.912   |
|           |                                                  | Alexa            | 4.43 | 4.014 | 2.93        | 5.93        | Intermediate |         |
|           |                                                  | Google Assistant | 4.67 | 3.417 | 3.39        | 5.94        | Intermediate |         |
|           |                                                  | Total            | 4.64 | 3.586 | 3.89        | 5.40        | Intermediate |         |
|           | Completeness of the answer                       | Siri             | 4.60 | 3.692 | 3.22        | 5.98        | Intermediate | 0.811   |
|           |                                                  | Alexa            | 3.97 | 4.064 | 2.45        | 5.48        | Intermediate |         |
|           |                                                  | Google Assistant | 4.30 | 3.573 | 2.97        | 5.63        | Intermediate |         |
|           |                                                  | Total            | 4.29 | 3.748 | 3.50        | 5.07        | Intermediate |         |
|           | Understandability of the response for a patient  | Siri             | 5.27 | 3.552 | 3.94        | 6.59        | Intermediate | 0.558   |
|           |                                                  | Alexa            | 4.33 | 3.960 | 2.85        | 5.81        | Intermediate |         |
|           |                                                  | Google Assistant | 4.43 | 3.461 | 3.14        | 5.73        | Intermediate |         |
|           |                                                  | Total            | 4.68 | 3.647 | 3.91        | 5.44        | Intermediate |         |
|           | Use of empathic language                         | Siri             | 2.13 | 2.156 | 0.98        | 3.27        | Low          | 0.234   |
|           |                                                  | Alexa            | 1.50 | 1.358 | 0.99        | 2.01        | Low          |         |
|           |                                                  | Google Assistant | 2.30 | 1.964 | 1.46        | 3.15        | Low          |         |
|           |                                                  | Total            | 1.91 | 1.788 | 1.48        | 2.34        | Low          |         |
|           | Authoritativeness of the scientific source cited | Siri             | 3.47 | 3.481 | 2.17        | 4.77        | Intermediate | 0.001   |
|           |                                                  | Alexa            | 0.67 | 1.204 | 0.16        | 1.18        | Low          |         |
|           |                                                  | Google Assistant | 2.41 | 2.653 | 1.40        | 3.42        | Low          |         |
|           |                                                  | Total            | 2.29 | 2.895 | 1.66        | 2.92        | Low          |         |
|           | Referral to other appropriate sources of help    | Siri             | 2.73 | 3.005 | 1.61        | 3.86        | Low          | <0.0001 |
|           |                                                  | Alexa            | 0.13 | .507  | -0.06       | 0.32        | Low          |         |
|           |                                                  | Google Assistant | 1.69 | 2.494 | 0.74        | 2.64        | Low          |         |
|           |                                                  | Total            | 1.52 | 2.491 | 0.99        | 2.04        | Low          |         |
| PE        | Targeted response to the problem                 | Siri             | 4.90 | 3.881 | 3.45        | 6.35        | Intermediate | <0.0001 |
|           |                                                  | Alexa            | 1.13 | 2.675 | 0.13        | 2.13        | Low          |         |
|           |                                                  | Google Assistant | 3.07 | 3.562 | 1.74        | 4.40        | Intermediate |         |
|           |                                                  | Total            | 3.03 | 3.710 | 2.26        | 3.81        | Intermediate |         |
|           | Scientific correctness of the answer             | Siri             | 3.47 | 2.813 | 2.42        | 4.52        | Intermediate | 0.004   |
|           |                                                  | Alexa            | 1.10 | 2.537 | 0.15        | 2.05        | Low          |         |
|           |                                                  | Google Assistant | 2.30 | 2.693 | 1.29        | 3.31        | Low          |         |
|           |                                                  | Total            | 2.29 | 2.825 | 1.70        | 2.88        | Low          |         |
|           | Completeness of the answer                       | Siri             | 4.27 | 3.383 | 3.00        | 5.53        | Intermediate | 0.002   |
|           |                                                  | Alexa            | 1.20 | 2.858 | 0.13        | 2.27        | Low          |         |
|           |                                                  | Google Assistant | 2.73 | 3.290 | 1.50        | 3.96        | Low          |         |

|    |                                                  |                  |             |              |             |             |              |         |
|----|--------------------------------------------------|------------------|-------------|--------------|-------------|-------------|--------------|---------|
| PD | Understandability of the response for a patient  | <i>Total</i>     | <b>2.73</b> | <b>3.391</b> | <b>2.02</b> | <b>3.44</b> | <i>Low</i>   | <0.0001 |
|    |                                                  | Siri             | 4.53        | 3.501        | 3.23        | 5.84        | Intermediate |         |
|    |                                                  | Alexa            | 0.93        | 2.463        | 0.01        | 1.85        | Low          |         |
|    |                                                  | Google Assistant | 2.47        | 2.968        | 1.36        | 3.57        | Low          |         |
|    | Use of empathic language                         | <i>Total</i>     | <b>2.64</b> | <b>3.323</b> | <b>1.95</b> | <b>3.34</b> | <i>Low</i>   | 0.791   |
|    |                                                  | Siri             | 0.43        | 0.514        | 0.13        | 0.73        | Low          |         |
|    |                                                  | Alexa            | 0.67        | 1.845        | -0.02       | 1.36        | Low          |         |
|    |                                                  | Google Assistant | 0.82        | 1.842        | 0.00        | 1.63        | Low          |         |
|    | Authoritativeness of the scientific source cited | <i>Total</i>     | <b>0.67</b> | <b>1.639</b> | <b>0.26</b> | <b>1.07</b> | <i>Low</i>   | 0.001   |
|    |                                                  | Siri             | 2.60        | 2.594        | 1.63        | 3.57        | Low          |         |
|    |                                                  | Alexa            | 0.47        | 0.973        | 0.10        | 0.83        | Low          |         |
|    |                                                  | Google Assistant | 1.90        | 2.455        | 0.96        | 2.83        | Low          |         |
|    | Referral to other appropriate sources of help    | <i>Total</i>     | <b>1.65</b> | <b>2.292</b> | <b>1.17</b> | <b>2.13</b> | <i>Low</i>   | <0.0001 |
|    |                                                  | Siri             | 1.80        | 1.972        | 1.06        | 2.54        | Low          |         |
|    |                                                  | Alexa            | 0.07        | 0.254        | -0.03       | 0.16        | Low          |         |
|    |                                                  | Google Assistant | 1.07        | 1.668        | 0.43        | 1.70        | Low          |         |
|    | Targeted response to the problem                 | <i>Total</i>     | <b>0.98</b> | <b>1.644</b> | <b>0.63</b> | <b>1.32</b> | <i>Low</i>   | 0.098   |
|    |                                                  | Siri             | 3.97        | 4.064        | 2.45        | 5.48        | Intermediate |         |
|    |                                                  | Alexa            | 1.90        | 3.438        | 0.62        | 3.18        | Low          |         |
|    |                                                  | Google Assistant | 2.67        | 3.585        | 1.33        | 4.01        | Low          |         |
|    | Scientific correctness of the answer             | <i>Total</i>     | <b>2.84</b> | <b>3.762</b> | <b>2.06</b> | <b>3.63</b> | <i>Low</i>   | 0.334   |
|    |                                                  | Siri             | 3.60        | 3.587        | 2.26        | 4.94        | Intermediate |         |
|    |                                                  | Alexa            | 2.20        | 3.624        | 0.85        | 3.55        | Low          |         |
|    |                                                  | Google Assistant | 2.90        | 3.708        | 1.52        | 4.28        | Low          |         |
|    | Completeness of the answer                       | <i>Total</i>     | <b>2.90</b> | <b>3.644</b> | <b>2.14</b> | <b>3.66</b> | <i>Low</i>   | 0.281   |
|    |                                                  | Siri             | 3.23        | 3.441        | 1.95        | 4.52        | Intermediate |         |
|    |                                                  | Alexa            | 1.80        | 3.458        | 0.51        | 3.09        | Low          |         |
|    |                                                  | Google Assistant | 2.53        | 3.481        | 1.23        | 3.83        | Low          |         |
|    | Understandability of the response for a patient  | <i>Total</i>     | <b>2.52</b> | <b>3.471</b> | <b>1.80</b> | <b>3.25</b> | <i>Low</i>   | 0.156   |
|    |                                                  | Siri             | 3.53        | 3.461        | 2.24        | 4.83        | Intermediate |         |
|    |                                                  | Alexa            | 1.83        | 3.217        | 0.63        | 3.03        | Low          |         |
|    |                                                  | Google Assistant | 2.63        | 3.459        | 1.34        | 3.92        | Low          |         |
|    | Use of empathic language                         | <i>Total</i>     | <b>2.67</b> | <b>3.415</b> | <b>1.95</b> | <b>3.38</b> | <i>Low</i>   | 0.211   |
|    |                                                  | Siri             | 0.00        | 0.000        | 0.00        | 0.00        | Low          |         |
|    |                                                  | Alexa            | 0.67        | 1.295        | 0.18        | 1.15        | Low          |         |
|    |                                                  | Google Assistant | 0.55        | 1.335        | -0.05       | 1.14        | Low          |         |
|    | Authoritativeness of the scientific source cited | <i>Total</i>     | <b>0.48</b> | <b>1.180</b> | <b>0.19</b> | <b>0.77</b> | <i>Low</i>   | 0.001   |
|    |                                                  | Siri             | 3.00        | 3.173        | 1.82        | 4.18        | Low          |         |
|    |                                                  | Alexa            | 0.53        | 0.860        | 0.21        | 0.85        | Low          |         |
|    |                                                  | Google Assistant | 1.83        | 2.692        | 0.83        | 2.84        | Low          |         |
|    | Referral to other                                | <i>Total</i>     | <b>1.79</b> | <b>2.629</b> | <b>1.24</b> | <b>2.34</b> | <i>Low</i>   | 0.004   |
|    |                                                  | Siri             | 1.93        | 3.005        | 0.81        | 3.06        | Low          |         |
|    |                                                  | Alexa            | 0.00        | 0.000        | 0.00        | 0.00        | Low          |         |

|                  |                                                  |                  |             |              |             |             |                     |         |
|------------------|--------------------------------------------------|------------------|-------------|--------------|-------------|-------------|---------------------|---------|
| Male Infertility | appropriate sources of help                      | Google Assistant | 1.23        | 2.329        | 0.36        | 2.10        | Low                 |         |
|                  |                                                  | <b>Total</b>     | <b>1.06</b> | <b>2.314</b> | <b>0.57</b> | <b>1.54</b> | <b>Low</b>          |         |
|                  | Targeted response to the problem                 | Siri             | 8.20        | 1.400        | 7.68        | 8.72        | High                | 0.054   |
|                  |                                                  | Alexa            | 6.63        | 3.316        | 5.39        | 7.87        | Intermediate        |         |
|                  |                                                  | Google Assistant | 7.13        | 2.474        | 6.21        | 8.06        | High                |         |
|                  |                                                  | <b>Total</b>     | <b>7.32</b> | <b>2.578</b> | <b>6.78</b> | <b>7.86</b> | <b>High</b>         |         |
|                  | Scientific correctness of the answer             | Siri             | 5.63        | 1.608        | 5.03        | 6.23        | Intermediate        | 0.811   |
|                  |                                                  | Alexa            | 6.07        | 3.581        | 4.73        | 7.40        | Intermediate        |         |
|                  |                                                  | Google Assistant | 6.00        | 2.804        | 4.95        | 7.05        | Intermediate        |         |
|                  |                                                  | <b>Total</b>     | <b>5.90</b> | <b>2.760</b> | <b>5.32</b> | <b>6.48</b> | <b>Intermediate</b> |         |
|                  | Completeness of the answer                       | Siri             | 5.07        | 1.760        | 4.41        | 5.72        | Intermediate        | 0.950   |
|                  |                                                  | Alexa            | 5.10        | 3.241        | 3.89        | 6.31        | Intermediate        |         |
|                  |                                                  | Google Assistant | 5.27        | 2.545        | 4.32        | 6.22        | Intermediate        |         |
|                  |                                                  | <b>Total</b>     | <b>5.14</b> | <b>2.560</b> | <b>4.61</b> | <b>5.68</b> | <b>Intermediate</b> |         |
|                  | Understandability of the response for a patient  | Siri             | 5.93        | 1.363        | 5.42        | 6.44        | Intermediate        | 0.243   |
|                  |                                                  | Alexa            | 4.97        | 3.253        | 3.75        | 6.18        | Intermediate        |         |
|                  |                                                  | Google Assistant | 5.00        | 2.533        | 4.05        | 5.95        | Intermediate        |         |
|                  |                                                  | <b>Total</b>     | <b>5.30</b> | <b>2.519</b> | <b>4.77</b> | <b>5.83</b> | <b>Intermediate</b> |         |
|                  | Use of empathic language                         | Siri             | 3.00        | 0.000        | 3.00        | 3.00        | Low                 | 0.470   |
|                  |                                                  | Alexa            | 1.67        | 1.493        | 1.11        | 2.22        | Low                 |         |
|                  |                                                  | Google Assistant | 1.88        | 1.586        | 1.03        | 2.72        | Low                 |         |
|                  |                                                  | <b>Total</b>     | <b>1.79</b> | <b>1.501</b> | <b>1.36</b> | <b>2.23</b> | <b>Low</b>          |         |
|                  | Authoritativeness of the scientific source cited | Siri             | 3.93        | 2.212        | 3.11        | 4.76        | Intermediate        | <0.0001 |
|                  |                                                  | Alexa            | 1.43        | 1.716        | 0.79        | 2.07        | Low                 |         |
|                  |                                                  | Google Assistant | 2.67        | 2.023        | 1.91        | 3.42        | Low                 |         |
|                  |                                                  | <b>Total</b>     | <b>2.68</b> | <b>2.223</b> | <b>2.21</b> | <b>3.14</b> | <b>Low</b>          |         |
|                  | Referral to other appropriate sources of help    | Siri             | 3.20        | 1.400        | 2.68        | 3.72        | Intermediate        | <0.0001 |
|                  |                                                  | Alexa            | 0.00        | 0.000        | 0.00        | 0.00        | Low                 |         |
|                  |                                                  | Google Assistant | 2.07        | 1.751        | 1.40        | 2.74        | Low                 |         |
|                  |                                                  | <b>Total</b>     | <b>1.75</b> | <b>1.848</b> | <b>1.36</b> | <b>2.14</b> | <b>Low</b>          |         |
| Other            | Targeted response to the problem                 | Siri             | 6.20        | 3.899        | 4.74        | 7.66        | Intermediate        | 0.020   |
|                  |                                                  | Alexa            | 3.37        | 3.970        | 1.88        | 4.85        | Intermediate        |         |
|                  |                                                  | Google Assistant | 4.40        | 3.775        | 2.99        | 5.81        | Intermediate        |         |
|                  |                                                  | <b>Total</b>     | <b>4.66</b> | <b>4.014</b> | <b>3.81</b> | <b>5.50</b> | <b>Intermediate</b> |         |
|                  | Scientific correctness of the answer             | Siri             | 4.00        | 3.523        | 2.68        | 5.32        | Intermediate        | 0.566   |
|                  |                                                  | Alexa            | 3.03        | 3.634        | 1.68        | 4.39        | Intermediate        |         |
|                  |                                                  | Google Assistant | 3.63        | 3.429        | 2.35        | 4.91        | Intermediate        |         |
|                  |                                                  | <b>Total</b>     | <b>3.56</b> | <b>3.513</b> | <b>2.82</b> | <b>4.29</b> | <b>Intermediate</b> |         |
|                  | Completeness of the answer                       | Siri             | 5.07        | 3.453        | 3.78        | 6.36        | Intermediate        | 0.070   |
|                  |                                                  | Alexa            | 2.90        | 3.661        | 1.53        | 4.27        | Low                 |         |
|                  |                                                  | Google Assistant | 3.93        | 3.648        | 2.57        | 5.30        | Intermediate        |         |
|                  |                                                  | <b>Total</b>     | <b>3.97</b> | <b>3.658</b> | <b>3.20</b> | <b>4.73</b> | <b>Intermediate</b> |         |

|                                                  |                  |             |              |             |             |                     |         |
|--------------------------------------------------|------------------|-------------|--------------|-------------|-------------|---------------------|---------|
| Understandability of the response for a patient  | Siri             | 5.13        | 3.170        | 3.95        | 6.32        | Intermediate        | 0.118   |
|                                                  | Alexa            | 3.30        | 3.678        | 1.93        | 4.67        | Intermediate        |         |
|                                                  | Google Assistant | 4.00        | 3.404        | 2.73        | 5.27        | Intermediate        |         |
|                                                  | <b>Total</b>     | <b>4.14</b> | <b>3.469</b> | <b>3.42</b> | <b>4.87</b> | <b>Intermediate</b> |         |
| Use of empathic language                         | Siri             | 1.00        | 1.907        | -0.21       | 2.21        | Low                 | 0.288   |
|                                                  | Alexa            | 0.33        | 0.922        | -0.01       | 0.68        | Low                 |         |
|                                                  | Google Assistant | 0.52        | 1.123        | 0.01        | 1.04        | Low                 |         |
|                                                  | <b>Total</b>     | <b>0.52</b> | <b>1.229</b> | <b>0.21</b> | <b>0.83</b> | <b>Low</b>          |         |
| Authoritativeness of the scientific source cited | Siri             | 3.20        | 2.882        | 2.12        | 4.28        | Intermediate        | <0.0001 |
|                                                  | Alexa            | 0.60        | 1.070        | 0.20        | 1.00        | Low                 |         |
|                                                  | Google Assistant | 1.87        | 2.432        | 0.96        | 2.77        | Low                 |         |
|                                                  | <b>Total</b>     | <b>1.89</b> | <b>2.479</b> | <b>1.37</b> | <b>2.41</b> | <b>Low</b>          |         |
| Referral to other appropriate sources of help    | Siri             | 0.87        | 0.819        | 0.56        | 1.17        | Low                 | 0.535   |
|                                                  | Alexa            | 0.67        | 1.882        | -0.04       | 1.37        | Low                 |         |
|                                                  | Google Assistant | 0.50        | 0.777        | 0.21        | 0.79        | Low                 |         |
|                                                  | <b>Total</b>     | <b>0.68</b> | <b>1.262</b> | <b>0.41</b> | <b>0.94</b> | <b>Low</b>          |         |

VA: Voice Assistant; SD: Standard Deviation; CI: Confidence Interval; ED: Erectile Dysfunction; PE: Premature Ejaculation; PD: Peyronie's Disease.

Arbitrary mean scores of 0-3 were associated with low quality, > 3 but < 7 with intermediate quality, and 7-10 with high quality.

Statistically significant p-values were marked in bold.

Table S3. Post hoc analysis: Comparison between VAs

| Condition | Domain<br>(Dependent<br>Variable)                      | VA 1             | VA 2             | Mean<br>Difference | Standard<br>Error | P-value           |
|-----------|--------------------------------------------------------|------------------|------------------|--------------------|-------------------|-------------------|
| ED        | Targeted response<br>to the problem                    | Siri             | Alexa            | 1.333              | 1.028             | 0.594             |
|           |                                                        |                  | Google Assistant | 0.500              | 1.028             | 1.000             |
|           |                                                        | Alexa            | Siri             | -1.333             | 1.028             | 0.594             |
|           |                                                        |                  | Google Assistant | -0.833             | 1.028             | 1.000             |
|           |                                                        | Google Assistant | Siri             | -0.500             | 1.028             | 1.000             |
|           |                                                        |                  | Alexa            | 0.833              | 1.028             | 1.000             |
|           | Scientific<br>correctness of the<br>answer             | Siri             | Alexa            | 0.400              | 0.936             | 1.000             |
|           |                                                        |                  | Google Assistant | 0.167              | 0.936             | 1.000             |
|           |                                                        | Alexa            | Siri             | -0.400             | 0.936             | 1.000             |
|           |                                                        |                  | Google Assistant | -0.233             | 0.936             | 1.000             |
|           |                                                        | Google Assistant | Siri             | -0.167             | 0.936             | 1.000             |
|           |                                                        |                  | Alexa            | 0.233              | 0.936             | 1.000             |
|           | Completeness of the<br>answer                          | Siri             | Alexa            | 0.633              | 0.977             | 1.000             |
|           |                                                        |                  | Google Assistant | 0.300              | 0.977             | 1.000             |
|           |                                                        | Alexa            | Siri             | -0.633             | 0.977             | 1.000             |
|           |                                                        |                  | Google Assistant | -0.333             | 0.977             | 1.000             |
|           |                                                        | Google Assistant | Siri             | -0.300             | 0.977             | 1.000             |
|           |                                                        |                  | Alexa            | 0.333              | 0.977             | 1.000             |
|           | Understandability<br>of the response for a<br>patient  | Siri             | Alexa            | 0.933              | 0.946             | 0.980             |
|           |                                                        |                  | Google Assistant | 0.833              | 0.946             | 1.000             |
|           |                                                        | Alexa            | Siri             | -0.933             | 0.946             | 0.980             |
|           |                                                        |                  | Google Assistant | -0.100             | 0.946             | 1.000             |
|           |                                                        | Google Assistant | Siri             | -0.833             | 0.946             | 1.000             |
|           |                                                        |                  | Alexa            | 0.100              | 0.946             | 1.000             |
|           | Use of empathic<br>language                            | Siri             | Alexa            | 0.625              | 0.550             | 0.779             |
|           |                                                        |                  | Google Assistant | -0.179             | 0.578             | 1.000             |
|           |                                                        | Alexa            | Siri             | -0.625             | 0.550             | 0.779             |
|           |                                                        |                  | Google Assistant | -0.804             | 0.492             | 0.321             |
|           |                                                        | Google Assistant | Siri             | 0.179              | 0.578             | 1.000             |
|           |                                                        |                  | Alexa            | 0.804              | 0.492             | 0.321             |
|           | Authoritativeness of<br>the scientific source<br>cited | Siri             | Alexa            | 2.800              | 0.739             | <b>0.001</b>      |
|           |                                                        |                  | Google Assistant | 1.053              | 0.702             | 0.413             |
|           |                                                        | Alexa            | Siri             | -2.800             | 0.739             | <b>0.001</b>      |
|           |                                                        |                  | Google Assistant | -1.747             | 0.744             | 0.064             |
|           |                                                        | Google Assistant | Siri             | -1.053             | 0.702             | 0.413             |
|           |                                                        |                  | Alexa            | 1.747              | 0.744             | 0.064             |
|           |                                                        | Siri             | Alexa            | 2.600              | 0.586             | <b>&lt;0.0001</b> |

|    |                                                  |                  |                  |        |       |         |
|----|--------------------------------------------------|------------------|------------------|--------|-------|---------|
|    | Referral to other appropriate sources of help    |                  | Google Assistant | 1.044  | 0.591 | 0.243   |
|    |                                                  | Alexa            | Siri             | -2.600 | 0.586 | <0.0001 |
|    |                                                  |                  | Google Assistant | -1.556 | 0.591 | 0.030   |
|    |                                                  | Google Assistant | Siri             | -1.044 | 0.591 | 0.243   |
|    |                                                  |                  | Alexa            | 1.556  | 0.591 | 0.030   |
| PE | Targeted response to the problem                 | Siri             | Alexa            | 3.767  | 0.881 | <0.0001 |
|    |                                                  |                  | Google Assistant | 1.833  | 0.881 | 0.121   |
|    |                                                  | Alexa            | Siri             | -3.767 | 0.881 | <0.0001 |
|    |                                                  |                  | Google Assistant | -1.933 | 0.881 | 0.092   |
|    |                                                  | Google Assistant | Siri             | -1.833 | 0.881 | 0.121   |
|    |                                                  |                  | Alexa            | 1.933  | 0.881 | 0.092   |
|    | Scientific correctness of the answer             | Siri             | Alexa            | 2.367  | 0.693 | 0.003   |
|    |                                                  |                  | Google Assistant | 1.167  | 0.693 | 0.287   |
|    |                                                  | Alexa            | Siri             | -2.367 | 0.693 | 0.003   |
|    |                                                  |                  | Google Assistant | -1.200 | 0.693 | 0.260   |
|    |                                                  | Google Assistant | Siri             | -1.167 | 0.693 | 0.287   |
|    |                                                  |                  | Alexa            | 1.200  | 0.693 | 0.260   |
|    | Completeness of the answer                       | Siri             | Alexa            | 3.067  | 0.822 | 0.001   |
|    |                                                  |                  | Google Assistant | 1.533  | 0.822 | 0.197   |
|    |                                                  | Alexa            | Siri             | -3.067 | 0.822 | 0.001   |
|    |                                                  |                  | Google Assistant | -1.533 | 0.822 | 0.197   |
|    |                                                  | Google Assistant | Siri             | -1.533 | 0.822 | 0.197   |
|    |                                                  |                  | Alexa            | 1.533  | 0.822 | 0.197   |
|    | Understandability of the response for a patient  | Siri             | Alexa            | 3.600  | 0.776 | <0.0001 |
|    |                                                  |                  | Google Assistant | 2.067  | 0.776 | 0.028   |
|    |                                                  | Alexa            | Siri             | -3.600 | 0.776 | <0.0001 |
|    |                                                  |                  | Google Assistant | -1.533 | 0.776 | 0.154   |
|    |                                                  | Google Assistant | Siri             | -2.067 | 0.776 | 0.028   |
|    |                                                  |                  | Alexa            | 1.533  | 0.776 | 0.154   |
|    | Use of empathic language                         | Siri             | Alexa            | -0.238 | 0.537 | 1.000   |
|    |                                                  |                  | Google Assistant | -0.390 | 0.567 | 1.000   |
|    |                                                  | Alexa            | Siri             | 0.238  | 0.537 | 1.000   |
|    |                                                  |                  | Google Assistant | -0.152 | 0.466 | 1.000   |
|    |                                                  | Google Assistant | Siri             | 0.390  | 0.567 | 1.000   |
|    |                                                  |                  | Alexa            | 0.152  | 0.466 | 1.000   |
|    | Authoritativeness of the scientific source cited | Siri             | Alexa            | 2.133  | 0.551 | 0.001   |
|    |                                                  |                  | Google Assistant | 0.703  | 0.556 | 0.626   |
|    |                                                  | Alexa            | Siri             | -2.133 | 0.551 | 0.001   |
|    |                                                  |                  | Google Assistant | -1.430 | 0.556 | 0.035   |

|           |                                                  |                  |                  |        |       |                   |
|-----------|--------------------------------------------------|------------------|------------------|--------|-------|-------------------|
|           | Referral to other appropriate sources of help    | Google Assistant | Siri             | -0.703 | 0.556 | 0.626             |
|           |                                                  |                  | Alexa            | 1.430  | 0.556 | <b>0.035</b>      |
|           |                                                  | Siri             | Alexa            | 1.733  | 0.386 | <b>&lt;0.0001</b> |
|           |                                                  |                  | Google Assistant | 0.731  | 0.390 | 0.192             |
|           |                                                  | Alexa            | Siri             | -1.733 | 0.386 | <b>&lt;0.0001</b> |
|           |                                                  |                  | Google Assistant | -1.002 | 0.390 | <b>0.035</b>      |
|           |                                                  | Google Assistant | Siri             | -0.731 | 0.390 | 0.192             |
|           |                                                  |                  | Alexa            | 1.002  | 0.390 | <b>0.035</b>      |
| <b>PD</b> | Targeted response to the problem                 | Siri             | Alexa            | 2.067  | 0.957 | 0.100             |
|           |                                                  |                  | Google Assistant | 1.300  | 0.957 | 0.533             |
|           |                                                  | Alexa            | Siri             | -2.067 | 0.957 | 0.100             |
|           |                                                  |                  | Google Assistant | -0.767 | 0.957 | 1.000             |
|           |                                                  | Google Assistant | Siri             | -1.300 | 0.957 | 0.533             |
|           |                                                  |                  | Alexa            | 0.767  | 0.957 | 1.000             |
|           | Scientific correctness of the answer             | Siri             | Alexa            | 1.400  | 0.940 | 0.420             |
|           |                                                  |                  | Google Assistant | 0.700  | 0.940 | 1.000             |
|           |                                                  | Alexa            | Siri             | -1.400 | 0.940 | 0.420             |
|           |                                                  |                  | Google Assistant | -0.700 | 0.940 | 1.000             |
|           |                                                  | Google Assistant | Siri             | -0.700 | 0.940 | 1.000             |
|           |                                                  |                  | Alexa            | 0.700  | 0.940 | 1.000             |
|           | Completeness of the answer                       | Siri             | Alexa            | 1.433  | 0.893 | 0.337             |
|           |                                                  |                  | Google Assistant | 0.700  | 0.893 | 1.000             |
|           |                                                  | Alexa            | Siri             | -1.433 | 0.893 | 0.337             |
|           |                                                  |                  | Google Assistant | -0.733 | 0.893 | 1.000             |
|           |                                                  | Google Assistant | Siri             | -0.700 | 0.893 | 1.000             |
|           |                                                  |                  | Alexa            | 0.733  | 0.893 | 1.000             |
|           | Understandability of the response for a patient  | Siri             | Alexa            | 1.700  | 0.873 | 0.164             |
|           |                                                  |                  | Google Assistant | 0.900  | 0.873 | 0.916             |
|           |                                                  | Alexa            | Siri             | -1.700 | 0.873 | 0.164             |
|           |                                                  |                  | Google Assistant | -0.800 | 0.873 | 1.000             |
|           |                                                  | Google Assistant | Siri             | -0.900 | 0.873 | 0.916             |
|           |                                                  |                  | Alexa            | 0.800  | 0.873 | 1.000             |
|           | Use of empathic language                         | Siri             | Alexa            | -0.667 | 0.378 | 0.249             |
|           |                                                  |                  | Google Assistant | -0.545 | 0.400 | 0.532             |
|           |                                                  | Alexa            | Siri             | 0.667  | 0.378 | 0.249             |
|           |                                                  |                  | Google Assistant | 0.121  | 0.328 | 1.000             |
|           |                                                  | Google Assistant | Siri             | 0.545  | 0.400 | 0.532             |
|           |                                                  |                  | Alexa            | -0.121 | 0.328 | 1.000             |
|           | Authoritativeness of the scientific source cited | Siri             | Alexa            | 2.467  | 0.633 | <b>0.001</b>      |
|           |                                                  |                  | Google Assistant | 1.167  | 0.633 | 0.207             |

|                         |                                                 |                  |                  |        |       |              |
|-------------------------|-------------------------------------------------|------------------|------------------|--------|-------|--------------|
|                         |                                                 | Alexa            | Siri             | -2.467 | 0.633 | <b>0.001</b> |
|                         |                                                 |                  | Google Assistant | -1.300 | 0.633 | 0.129        |
|                         |                                                 | Google Assistant | Siri             | -1.167 | 0.633 | 0.207        |
|                         |                                                 |                  | Alexa            | 1.300  | 0.633 | 0.129        |
|                         | Referral to other appropriate sources of help   | Siri             | Alexa            | 1.933  | 0.567 | <b>0.003</b> |
|                         |                                                 |                  | Google Assistant | 0.700  | 0.567 | 0.660        |
|                         |                                                 | Alexa            | Siri             | -1.933 | 0.567 | <b>0.003</b> |
|                         |                                                 |                  | Google Assistant | -1.233 | 0.567 | 0.097        |
|                         |                                                 | Google Assistant | Siri             | -0.700 | 0.567 | 0.660        |
|                         |                                                 |                  | Alexa            | 1.233  | 0.567 | 0.097        |
| <b>Male Infertility</b> | Targeted response to the problem                | Siri             | Alexa            | 1.567  | 0.651 | 0.055        |
|                         |                                                 |                  | Google Assistant | 1.067  | 0.651 | 0.315        |
|                         |                                                 | Alexa            | Siri             | -1.567 | 0.651 | 0.055        |
|                         |                                                 |                  | Google Assistant | -0.500 | 0.651 | 1.000        |
|                         |                                                 | Google Assistant | Siri             | -1.067 | 0.651 | 0.315        |
|                         |                                                 |                  | Alexa            | 0.500  | 0.651 | 1.000        |
|                         | Scientific correctness of the answer            | Siri             | Alexa            | -0.433 | 0.719 | 1.000        |
|                         |                                                 |                  | Google Assistant | -0.367 | 0.719 | 1.000        |
|                         |                                                 | Alexa            | Siri             | 0.433  | 0.719 | 1.000        |
|                         |                                                 |                  | Google Assistant | 0.067  | 0.719 | 1.000        |
|                         |                                                 | Google Assistant | Siri             | 0.367  | 0.719 | 1.000        |
|                         |                                                 |                  | Alexa            | -0.067 | 0.719 | 1.000        |
|                         | Completeness of the answer                      | Siri             | Alexa            | -0.033 | 0.668 | 1.000        |
|                         |                                                 |                  | Google Assistant | -0.200 | 0.668 | 1.000        |
|                         |                                                 | Alexa            | Siri             | 0.033  | 0.668 | 1.000        |
|                         |                                                 |                  | Google Assistant | -0.167 | 0.668 | 1.000        |
|                         |                                                 | Google Assistant | Siri             | 0.200  | 0.668 | 1.000        |
|                         |                                                 |                  | Alexa            | 0.167  | 0.668 | 1.000        |
|                         | Understandability of the response for a patient | Siri             | Alexa            | 0.967  | 0.647 | 0.417        |
|                         |                                                 |                  | Google Assistant | 0.933  | 0.647 | 0.459        |
|                         |                                                 | Alexa            | Siri             | -0.967 | 0.647 | 0.417        |
|                         |                                                 |                  | Google Assistant | -0.033 | 0.647 | 1.000        |
|                         |                                                 | Google Assistant | Siri             | -0.933 | 0.647 | 0.459        |
|                         |                                                 |                  | Alexa            | 0.033  | 0.647 | 1.000        |
|                         | Use of empathic language                        | Siri             | Alexa            | 1.333  | 1.102 | 0.698        |
|                         |                                                 |                  | Google Assistant | 1.125  | 1.131 | 0.976        |
|                         |                                                 | Alexa            | Siri             | -1.333 | 1.102 | 0.698        |
|                         |                                                 |                  | Google Assistant | -0.208 | 0.467 | 1.000        |
|                         |                                                 | Google Assistant | Siri             | -1.125 | 1.131 | 0.976        |
|                         |                                                 |                  | Alexa            | 0.208  | 0.467 | 1.000        |

|       |                                                  |                  |                  |        |       |         |
|-------|--------------------------------------------------|------------------|------------------|--------|-------|---------|
|       | Authoritativeness of the scientific source cited | Siri             | Alexa            | 2.500  | 0.515 | <0.0001 |
|       |                                                  |                  | Google Assistant | 1.267  | 0.515 | 0.048   |
|       |                                                  | Alexa            | Siri             | -2.500 | 0.515 | <0.0001 |
|       |                                                  |                  | Google Assistant | -1.233 | 0.515 | 0.056   |
|       |                                                  | Google Assistant | Siri             | -1.267 | 0.515 | 0.048   |
|       |                                                  |                  | Alexa            | 1.233  | 0.515 | 0.056   |
|       | Referral to other appropriate sources of help    | Siri             | Alexa            | 3.200  | 0.333 | <0.0001 |
|       |                                                  |                  | Google Assistant | 1.131  | 0.335 | 0.003   |
|       |                                                  | Alexa            | Siri             | -3.200 | 0.333 | <0.0001 |
|       |                                                  |                  | Google Assistant | -2.069 | 0.335 | <0.0001 |
|       |                                                  | Google Assistant | Siri             | -1.131 | 0.335 | 0.003   |
|       |                                                  |                  | Alexa            | 2.069  | 0.335 | <0.0001 |
| Other | Targeted response to the problem                 | Siri             | Alexa            | 2.833  | 1.002 | 0.017   |
|       |                                                  |                  | Google Assistant | 1.800  | 1.002 | 0.228   |
|       |                                                  | Alexa            | Siri             | -2.833 | 1.002 | 0.017   |
|       |                                                  |                  | Google Assistant | -1.033 | 1.002 | 0.916   |
|       |                                                  | Google Assistant | Siri             | -1.800 | 1.002 | 0.228   |
|       |                                                  |                  | Alexa            | 1.033  | 1.002 | 0.916   |
|       | Scientific correctness of the answer             | Siri             | Alexa            | 0.967  | 0.911 | 0.875   |
|       |                                                  |                  | Google Assistant | 0.367  | 0.911 | 1.000   |
|       |                                                  | Alexa            | Siri             | -0.967 | 0.911 | 0.875   |
|       |                                                  |                  | Google Assistant | -0.600 | 0.911 | 1.000   |
|       |                                                  | Google Assistant | Siri             | -0.367 | 0.911 | 1.000   |
|       |                                                  |                  | Alexa            | 0.600  | 0.911 | 1.000   |
|       | Completeness of the answer                       | Siri             | Alexa            | 2.167  | 0.927 | 0.065   |
|       |                                                  |                  | Google Assistant | 1.133  | 0.927 | 0.674   |
|       |                                                  | Alexa            | Siri             | -2.167 | 0.927 | 0.065   |
|       |                                                  |                  | Google Assistant | -1.033 | 0.927 | 0.804   |
|       |                                                  | Google Assistant | Siri             | -1.133 | 0.927 | 0.674   |
|       |                                                  |                  | Alexa            | 1.033  | 0.927 | 0.804   |
|       | Understandability of the response for a patient  | Siri             | Alexa            | 1.833  | 0.884 | 0.123   |
|       |                                                  |                  | Google Assistant | 1.133  | 0.884 | 0.610   |
|       |                                                  | Alexa            | Siri             | -1.833 | 0.884 | 0.123   |
|       |                                                  |                  | Google Assistant | -0.700 | 0.884 | 1.000   |
|       |                                                  | Google Assistant | Siri             | -1.133 | 0.884 | 0.610   |
|       |                                                  |                  | Alexa            | 0.700  | 0.884 | 1.000   |
|       | Use of empathic language                         | Siri             | Alexa            | 0.667  | 0.418 | 0.348   |
|       |                                                  |                  | Google Assistant | 0.476  | 0.443 | 0.860   |
|       |                                                  | Alexa            | Siri             | -0.667 | 0.418 | 0.348   |

|  |                                                  |                  |                  |        |       |                   |
|--|--------------------------------------------------|------------------|------------------|--------|-------|-------------------|
|  |                                                  |                  | Google Assistant | -0.190 | 0.348 | 1.000             |
|  |                                                  |                  | Siri             | -0.476 | 0.443 | 0.860             |
|  |                                                  | Google Assistant | Alexa            | 0.190  | 0.348 | 1.000             |
|  | Authoritativeness of the scientific source cited | Siri             | Alexa            | 2.600  | 0.584 | <b>&lt;0.0001</b> |
|  |                                                  |                  | Google Assistant | 1.333  | 0.584 | 0.075             |
|  |                                                  | Alexa            | Siri             | -2.600 | 0.584 | <b>&lt;0.0001</b> |
|  |                                                  |                  | Google Assistant | -1.267 | 0.584 | 0.099             |
|  |                                                  | Google Assistant | Siri             | -1.333 | 0.584 | 0.075             |
|  |                                                  |                  | Alexa            | 1.267  | 0.584 | 0.099             |
|  | Referral to other appropriate sources of help    | Siri             | Alexa            | 0.200  | 0.327 | 1.000             |
|  |                                                  |                  | Google Assistant | 0.367  | 0.327 | 0.796             |
|  |                                                  | Alexa            | Siri             | -0.200 | 0.327 | 1.000             |
|  |                                                  |                  | Google Assistant | 0.167  | 0.327 | 1.000             |
|  |                                                  | Google Assistant | Siri             | -0.367 | 0.327 | 0.796             |
|  |                                                  |                  | Alexa            | -0.167 | 0.327 | 1.000             |

VA: Voice Assistant; SD: Standard Deviation; CI: Confidence Interval; ED: Erectile Dysfunction; PE: Premature Ejaculation; PD: Peyronie’s Disease.  
Statistically significant p-values were marked in bold.
